# Supplementary figures and images for: Citrus junos Tanaka Peel Extract and Its Bioactive Naringin Reduce Fine Dust-Induced Respiratory Injury Markers in BALB/c Male Mice
Source: MDPI journal article supplement (doi:10.3390/nu14051101), 2022-03-05

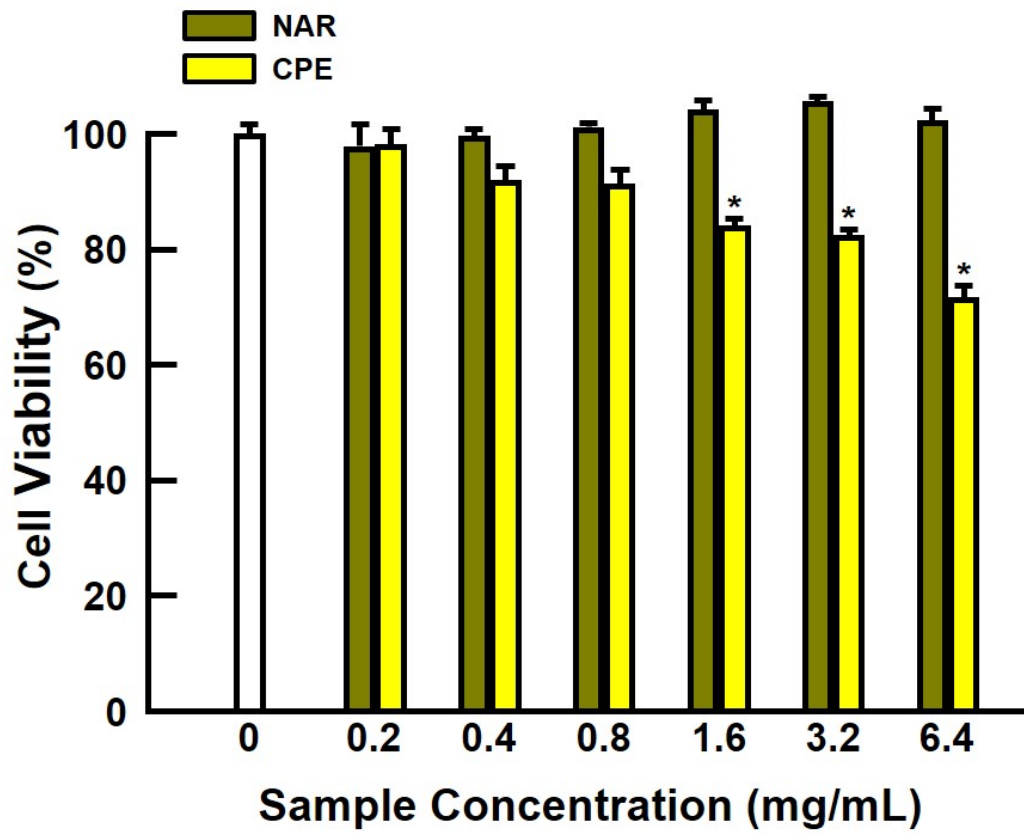

Figure S1. Cytotoxicity of CPE and NAR treatment on NCI-H460 cell line.

Supplement: s1 [file s1]
